# Supplementary material for: Nuclear respiratory factor 2 induces SIRT3 expression
Source: PubMed Central journal article supplement (PMC4568969; doi:10.1111/acel.12360), 2015-06-24

**Figure S1**

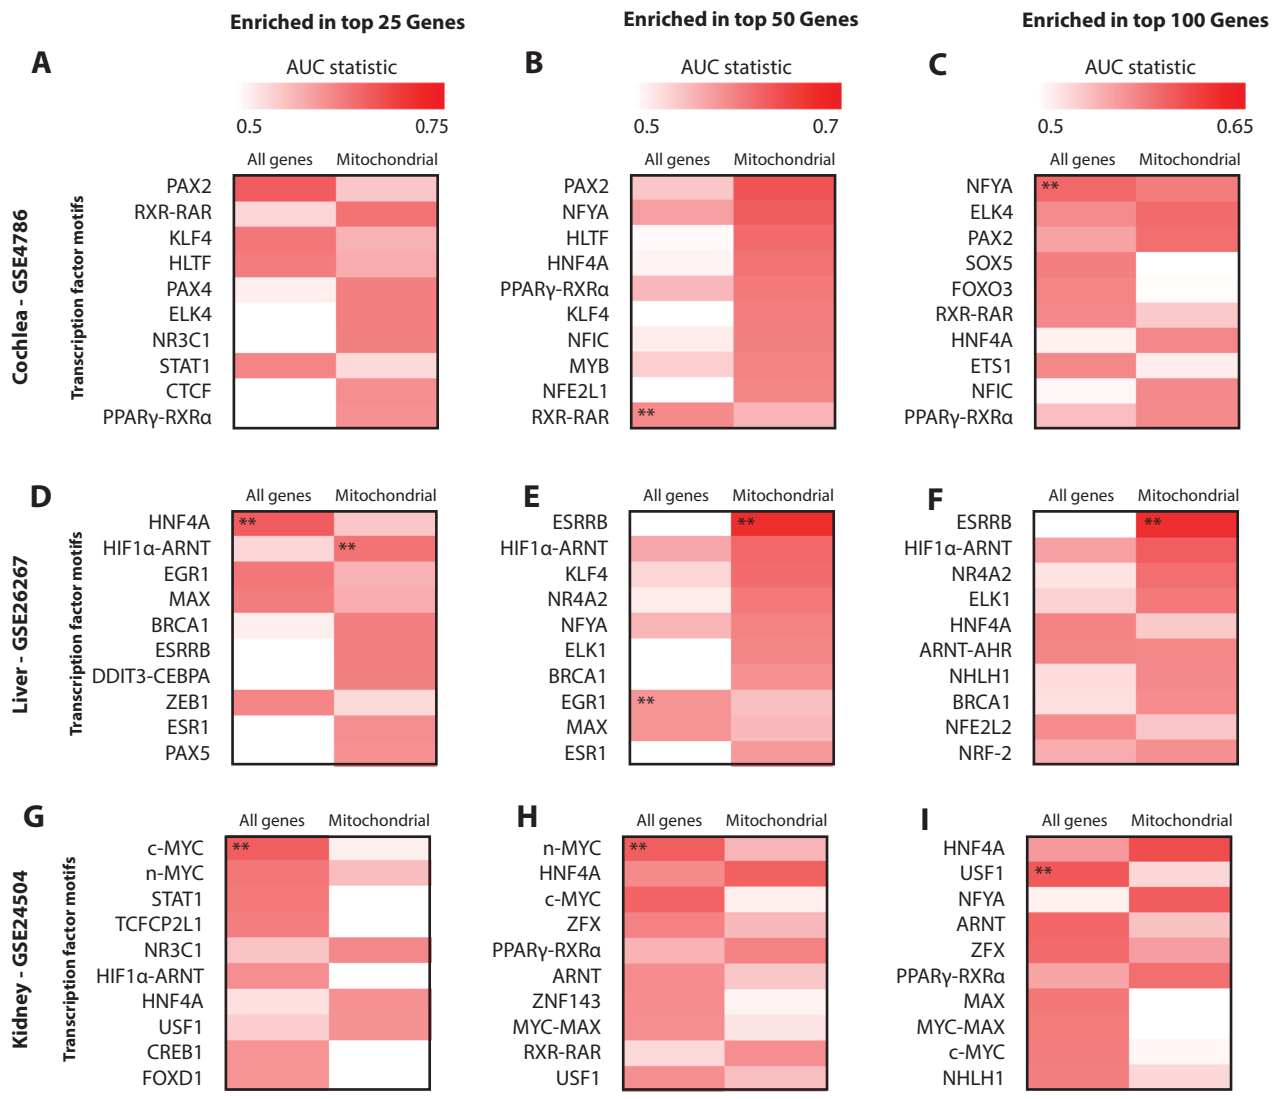

Supplement: acel0014-0818-sd1.pdf [file acel0014-0818-sd1.pdf]
